# Supplementary material for: Pembangunan Perisian Mata Pelajaran Kemahiran Hidup Bersepadu Unit TerasKomponen Elektronik Tingkatan Dua
Source: Hindawi journal article supplement (doi:10.1155/2019/2524583), 2010-12-06

## Additional Figures for Review Process

### Modified SVJN

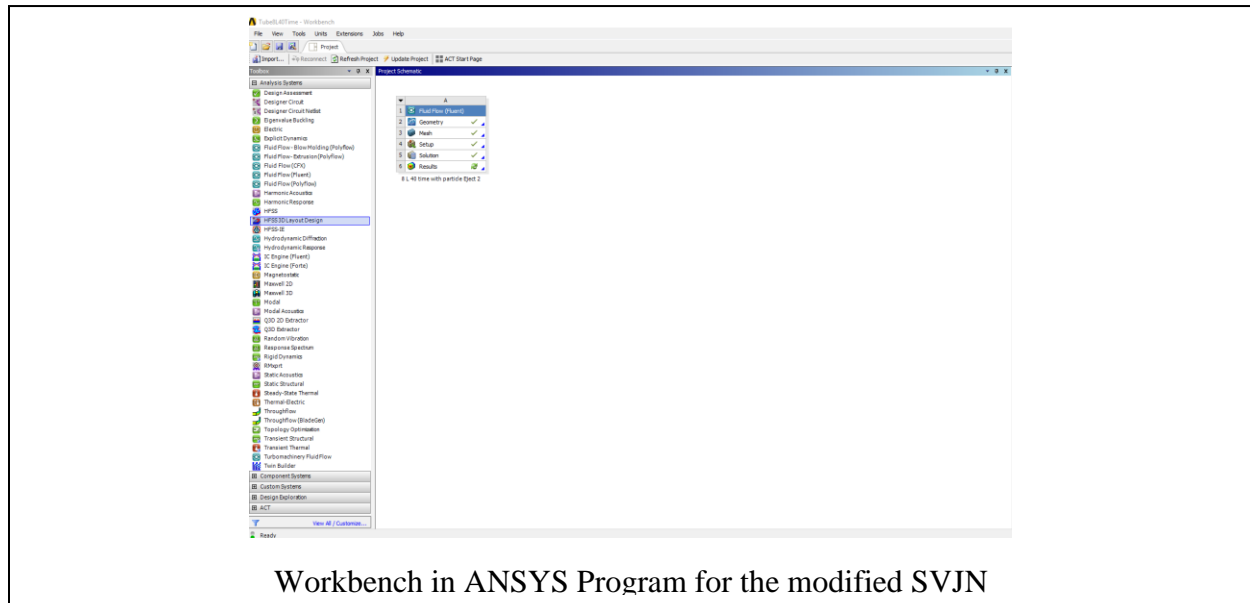

Workbench in ANSYS Program for the modified SVJN

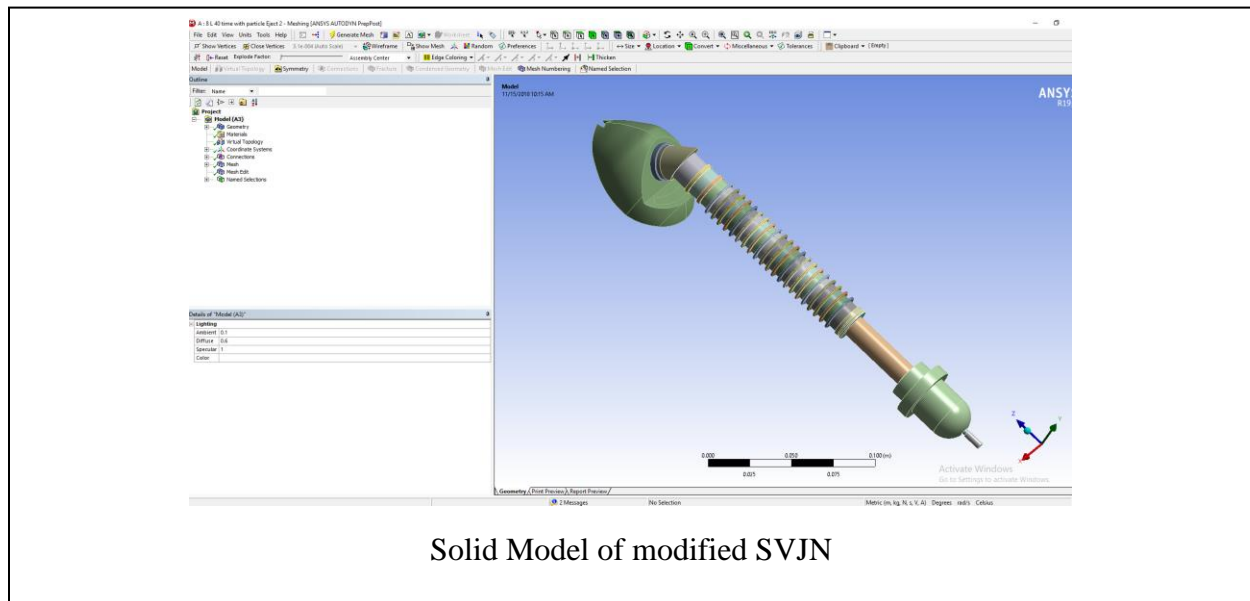

Solid Model of modified SVJN

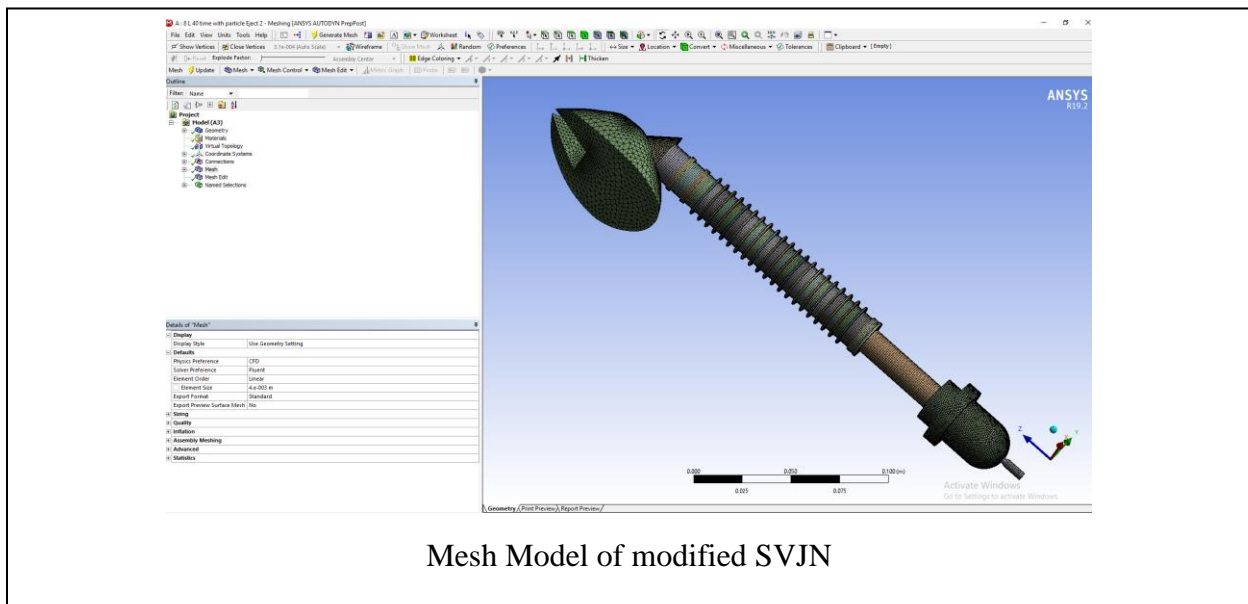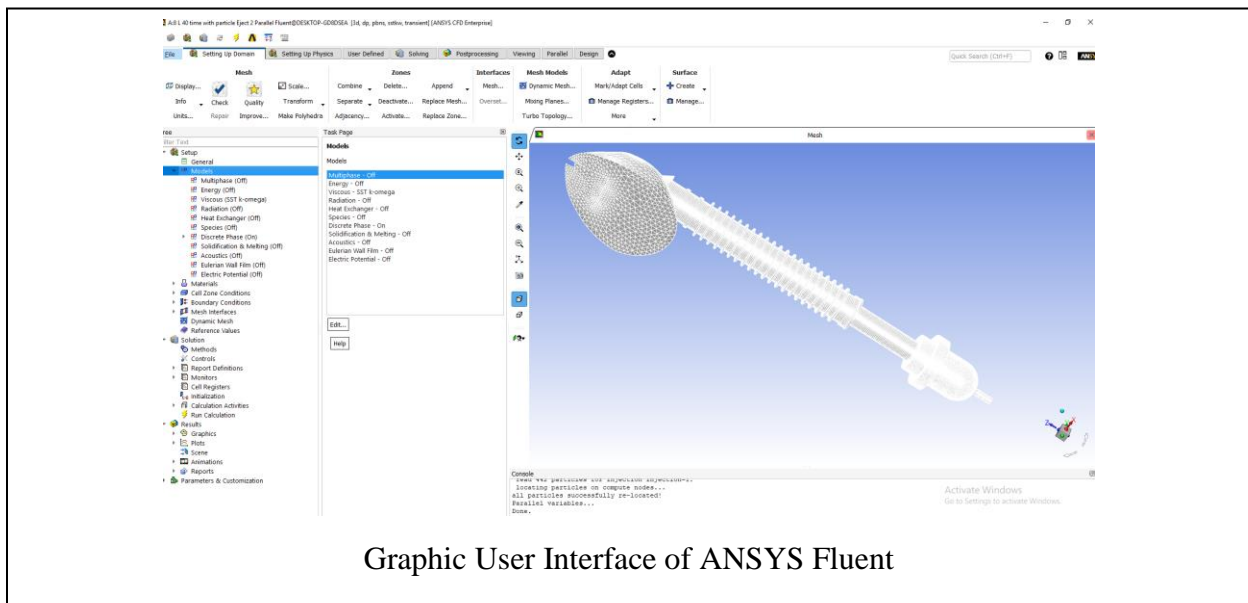

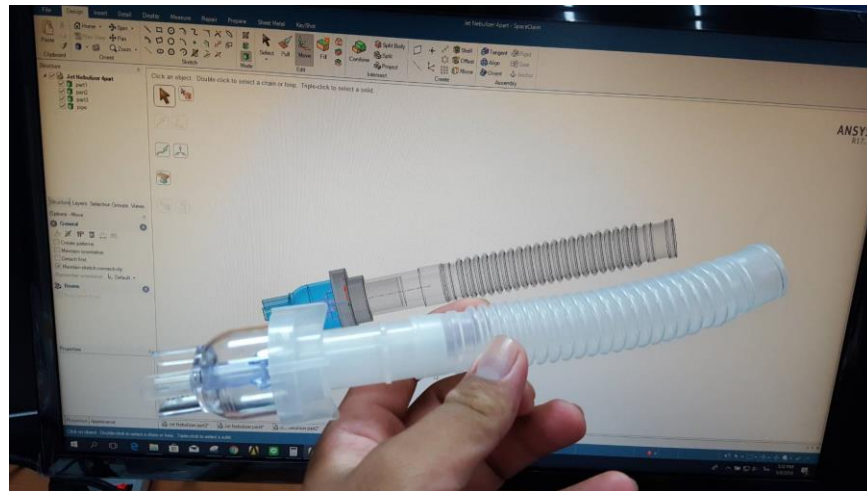

Comparison between the actual model of modified SVJN and CAD model

## Traditional SVJN

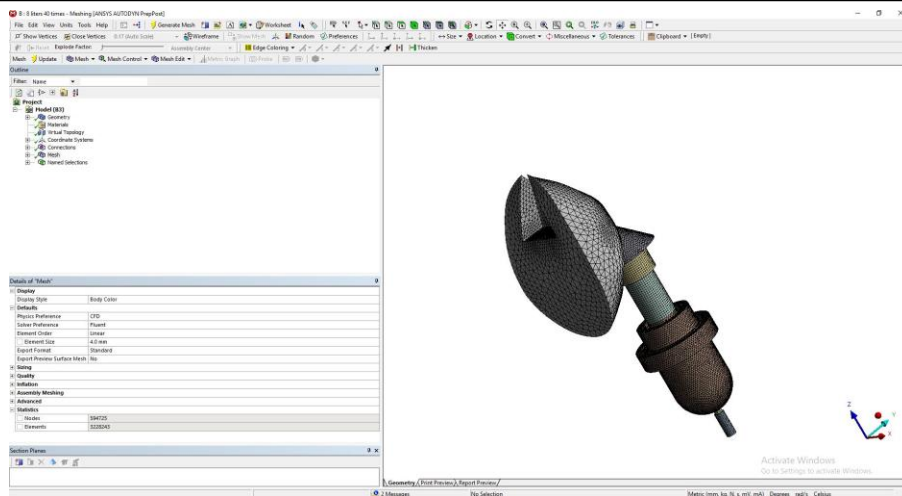

Mesh model of the traditional SVJN

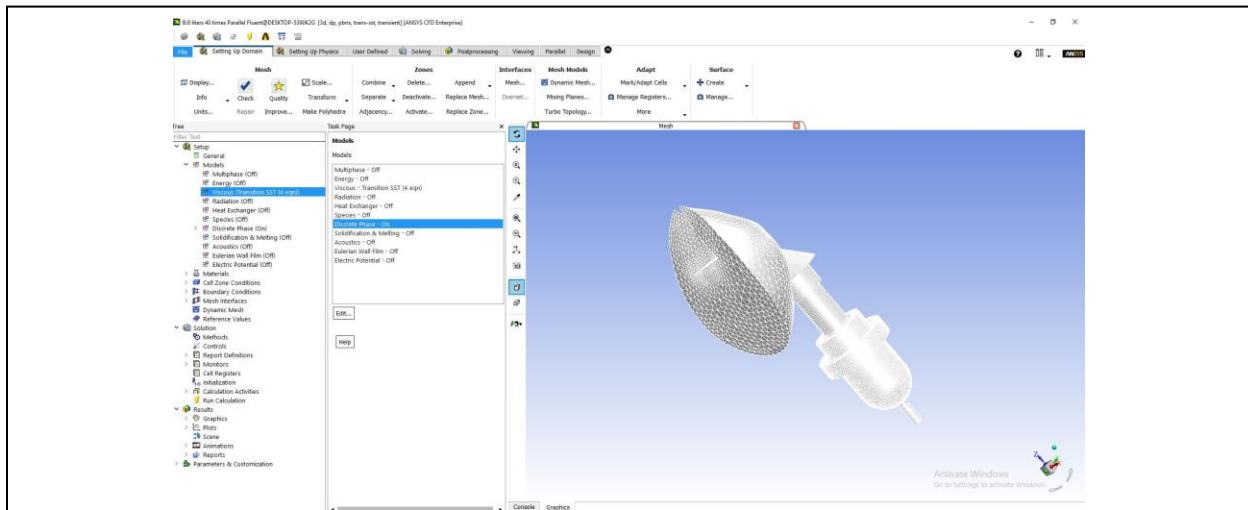

Graphic user interface of ANSYS Fluent for traditional SVJN

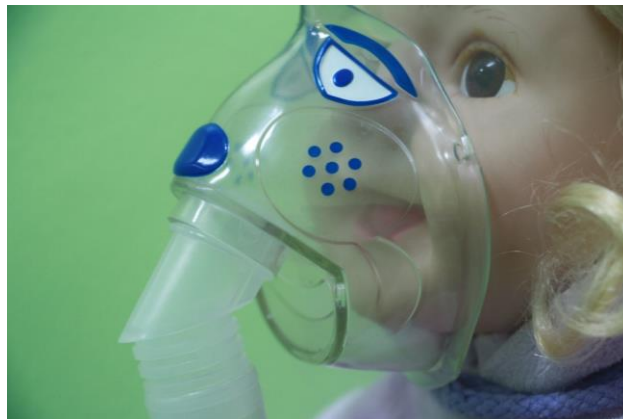

Sample picture of mask and conglugated tube, drug mist inside the SVJN is very difficult to view so the CFD is the best way to understand its behavior.

**Samples of animations have been included in the files.**

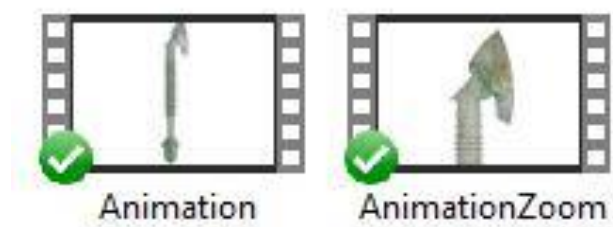

Supplement: f1 [file 2524583.f1.zip]
